# Supplementary material for: Risk factors for HPV infection and high-grade cervical disease in sexually active Japanese women
Source: PubMed Central journal article supplement (PMC7858628; doi:10.1038/s41598-021-82354-6), 2021-02-03
Supplement: 41598_2021_82354_MOESM1_ESM.pdf [file 41598_2021_82354_MOESM1_ESM.pdf]

## **Supplementary Information**

**Risk factors for HPV infection and high-grade cervical disease in sexually active Japanese women**

**Manako Yamaguchi, Masayuki Sekine, Sharon J. B. Hanley, Risa Kudo, Megumi Hara, Sosuke Adachi, Yutaka Ueda, Etsuko Miyagi and Takayuki Enomoto**

**Supplementary table 1. The prevalence of Human Papillomavirus (HPV) type-specific infection**

|               | All<br>(n=3231) |      |
|---------------|-----------------|------|
|               | n               | %    |
| HPV infection |                 |      |
| HPV16         | 61              | 1.9% |
| HPV18         | 19              | 0.6% |
| HPV31         | 33              | 1.0% |
| HPV33         | 10              | 0.3% |
| HPV35         | 9               | 0.3% |
| HPV39         | 21              | 0.6% |
| HPV45         | 2               | 0.1% |
| HPV51         | 23              | 0.7% |
| HPV52         | 98              | 3.0% |
| HPV56         | 33              | 1.0% |
| HPV58         | 59              | 1.8% |
| HPV59         | 16              | 0.5% |
| HPV68         | 20              | 0.6% |
